# Supplementary material for: Predicting Agents That Can Overcome 5-FU Resistance in Colorectal Cancers via Pharmacogenomic Analysis
Source: MDPI journal article supplement (doi:10.3390/biomedicines9080882), 2021-07-24
Supplement: s1 [file s1]

*Supplementary Materials*

## **Predicting Agents that can Overcome 5-FU Resistance in Colorectal Cancers via Pharmacogenomic Analysis**

**Table S1.** Functional enrichment analysis of upregulated genes in 5-FU resistant HCT116 cells.

| Name                                      | Adj. <i>p</i> -Value (Bonferroni) |
|-------------------------------------------|-----------------------------------|
| Molecular Function                        |                                   |
| receptor binding                          | $2.26 \times 10^{-54}$            |
| growth factor activity                    | $5.52 \times 10^{-12}$            |
| cytokine receptor binding                 | $6.37 \times 10^{-10}$            |
| cytokine activity                         | $7.48 \times 10^{-8}$             |
| hormone activity                          | $2.89 \times 10^{-4}$             |
| growth factor receptor binding            | $8.49 \times 10^{-3}$             |
| chemoattractant activity                  | $8.51 \times 10^{-3}$             |
| tumor necrosis factor receptor binding    | $3.23 \times 10^{-2}$             |
| protein complex binding                   | $4.95 \times 10^{-2}$             |
| glycosaminoglycan binding                 | $6.58 \times 10^{-2}$             |
| Biological Process                        |                                   |
| cell migration                            | $2.50 \times 10^{-11}$            |
| localization of cell                      | $1.47 \times 10^{-10}$            |
| cell motility                             | $1.47 \times 10^{-10}$            |
| regulation of cell migration              | $1.41 \times 10^{-9}$             |
| regulation of cell motility               | $3.34 \times 10^{-9}$             |
| regulation of locomotion                  | $1.48 \times 10^{-8}$             |
| regulation of cellular component movement | $1.96 \times 10^{-8}$             |
| locomotion                                | $2.91 \times 10^{-8}$             |
| positive regulation of cell migration     | $8.60 \times 10^{-8}$             |
| positive regulation of cell motility      | $1.07 \times 10^{-7}$             |
| Cellular Component                        |                                   |
| extracellular space from receptor binding | $4.39 \times 10^{-11}$            |

**Table S2.** Functional enrichment analysis of downregulated genes in 5-FU resistant HCT116 cells.

| Name                                 | Adj. <i>p</i> -value (Bonferroni) |
|--------------------------------------|-----------------------------------|
| Molecular Function                   |                                   |
| RNA binding                          | $2.80 \times 10^{-5}$             |
| poly(A) RNA binding                  | $7.56 \times 10^{-5}$             |
| Biological Process                   |                                   |
| ncRNA processing                     | $6.45 \times 10^{-9}$             |
| ncRNA metabolic process              | $2.39 \times 10^{-7}$             |
| rRNA metabolic process               | $1.84 \times 10^{-6}$             |
| ribonucleoprotein complex biogenesis | $2.87 \times 10^{-6}$             |
| ribosome biogenesis                  | $3.43 \times 10^{-6}$             |
| rRNA processing                      | $7.39 \times 10^{-6}$             |
| RNA processing                       | $1.28 \times 10^{-3}$             |
| RNA modification                     | $4.81 \times 10^{-2}$             |
| Cellular Component                   |                                   |
| nucleolus                            | $2.51 \times 10^{-7}$             |

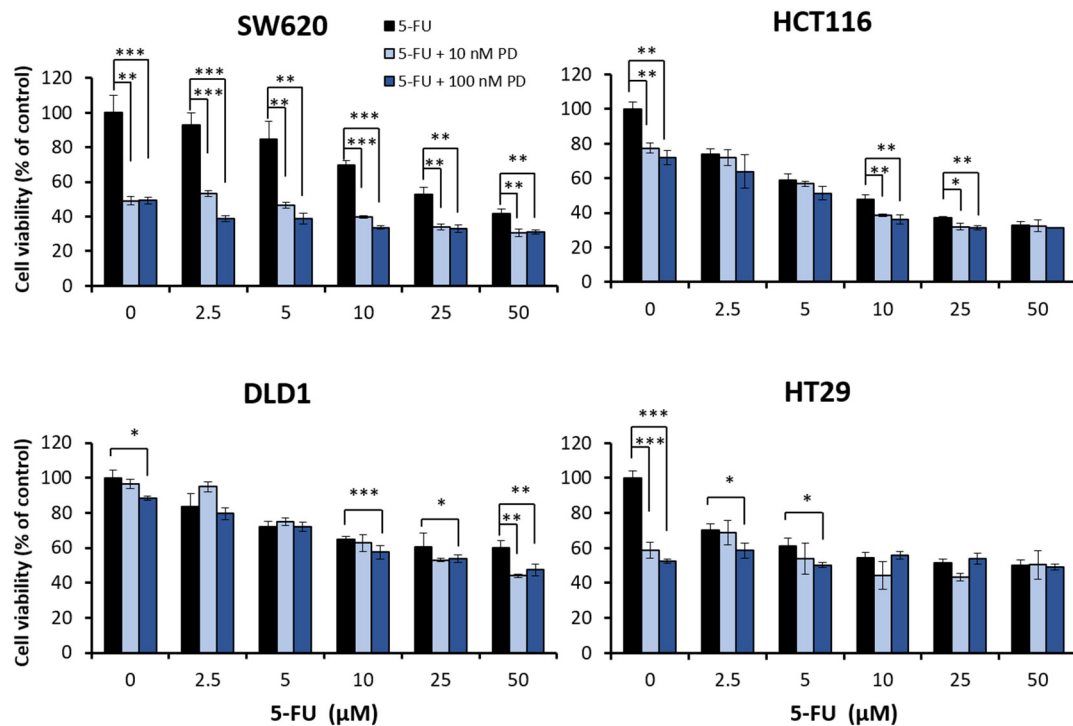

**Figure S1.** MEK inhibitor PD-0325901 is cytotoxic to APC mutated CRC cells. Cells were treated with 5-FU alone at indicated concentrations (black bars) or treated with 5-FU in the combination of MEK inhibitor PD-0325901 at the concentration of 10 nM, and 100 nM represent in light blue bars and dark blue bars, respectively. \*,  $p < 0.05$ ; \*\*,  $p < 0.01$ ; \*\*\*,  $p < 0.001$ ; in compared with 5-FU alone treated cell viability.

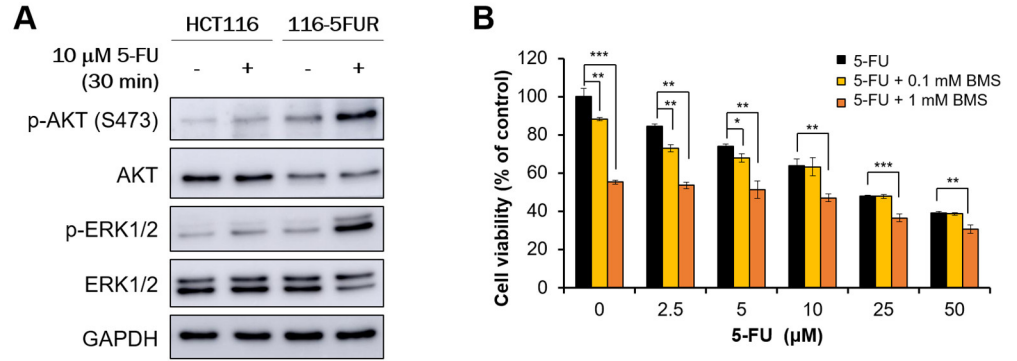

**Figure S2.** IGF1R inhibitor increases the response of resistant cells to 5-FU. **(A)** Cells were treated with 5-FU for 30 minutes and subjected to examine the level of IGF1R downstream signaling, AKT and ERK phosphorylation. GAPDH was the loading control. **(B)** 116-5FUR cells were treated with BMS-754807 (BMS) and 5-FU at indicated concentrations. Cell viability was measured and normalized to DMSO treated cells. Chrome yellow and orange bars show different doses of BMS. \*,  $p < 0.05$ ; \*\*,  $p < 0.01$ ; \*\*\*,  $p < 0.001$ ; in compared with 5-FU alone treated cell viability.
